# Supplementary material for: Transforming a highly toxic agent DM1 into injectable safe nanomedicines via prodrug self-assembly for the treatment of taxane-resistant cancer
Source: Royal Society of Chemistry journal article supplement (doi:10.1039/d3nr00680h), 2023-01-01
Supplement: d3nr00680h1.pdf [file d3nr00680h1.pdf]

## Supporting Information for Transforming a Highly Toxic Agent into Injectable Safe Nanomedicines *via* Prodrug Self-Assembly for the Treatment of Taxane-Resistant Cancer

### Synthesis of dSS-DM1 Conjugate

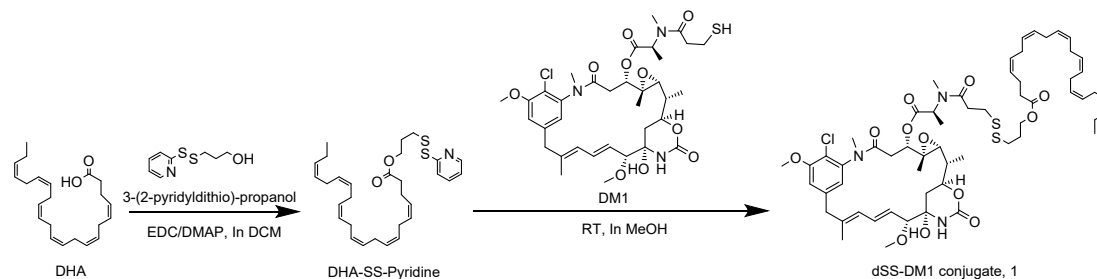

**Supplementary Scheme 1.** Synthetic scheme of conjugate 1

Docosahexaenoic acid (DHA, 50.0 mg, 0.159 mmol) and 3-(2-pyridyldithio)-propanol (96.0 mg, 0.477 mmol) were dissolved in 2 mL of anhydrous dichloromethane (DCM). Next, 1-ethyl-3-(3-dimethylaminopropyl)-carbodiimide (EDC, 36.6 mg, 0.191 mmol) and 4-dimethylamino pyridine (DMAP, 23.3 mg, 0.191 mmol) was added to the solution. The reaction mixture was stirred at 45 °C for 4 h and then washed with 5% citric acid, saturated NaHCO<sub>3</sub> and brine. The organic layer was dried over anhydrous Na<sub>2</sub>SO<sub>4</sub>, filtered, and evaporated under vacuum. The crude residue was purified by flash column chromatography on silica gel (DCM:MeOH = 100:1) to obtain the DHA-SS-Pyridine (48 mg, yield: 60.65%) and further characterized by <sup>1</sup>H NMR spectroscopy.

<sup>1</sup>H NMR (400 MHz, CDCl<sub>3</sub>) δ 8.47 (d, J = 4.6 Hz, 1H), 7.82 – 7.59 (m, 2H), 7.16 – 7.00 (m, 1H), 5.37 (dt, J = 11.4, 5.9 Hz, 10H), 4.17 (t, J = 6.2 Hz, 3H), 2.91 – 2.69 (m, 10H), 2.48 – 2.27 (m, 5H), 2.13 – 1.80 (m, 6H), 1.26 (s, 3H), 0.97 (t, J = 7.5 Hz, 3H).

DHA-SS-Pyridine (45.0 mg, 0.0879 mmol) and Maytansinoid (DM1, 39.3 mg, 0.0532 mmol) were dissolved in 2 mL of anhydrous DCM. After stirred at room temperature over 2 h, the reaction mixture was evaporated under vacuum. The residue was purified by flash column chromatography on silica gel (DCM:MeOH = 100:1) to produce the desired conjugate 1 (25.7 mg, yield: 42.4%). The conjugate 1 was characterized by <sup>1</sup>H NMR spectroscopy.

<sup>1</sup>H NMR (400 MHz, C<sub>2</sub>D<sub>6</sub>SO) δ 6.86 – 6.77 (m, 1H), 6.66 (d, J = 15.7 Hz, 2H), 6.43 (dd, J = 15.3, 11.2 Hz, 1H), 6.26 (s, 1H), 6.02 – 5.88 (m, 1H), 5.64 (dd, J = 15.2, 9.0 Hz, 1H), 5.45 – 5.30 (m, 13H), 4.78 (dd, J = 11.9, 2.2 Hz, 1H), 4.31 – 4.25 (m, 1H), 3.99 (s, 3H), 3.75 – 3.59 (m, 3H), 3.54 (ddd, J = 15.1, 6.9, 4.0 Hz, 3H), 3.35 (s, 3H), 3.20 (s, 3H), 3.14 – 3.05 (m, 2H), 3.01 (dt, J = 10.3, 7.7 Hz, 2H), 2.91 – 2.73 (m, 14H), 2.70 – 2.55 (m, 2H), 2.40 – 2.28 (m, 3H), 2.17 (ddd, J = 14.6, 9.4, 5.1 Hz, 3H), 2.07 (dd, J = 14.6, 7.4 Hz, 2H), 1.82 – 1.68 (m, 1H), 1.64 (s, 3H), 1.34 – 1.29 (m, 6H), 0.97 (t, J = 7.5 Hz, 3H), 0.80 (s, 3H).

## Synthesis of dMT-DM1 Conjugate

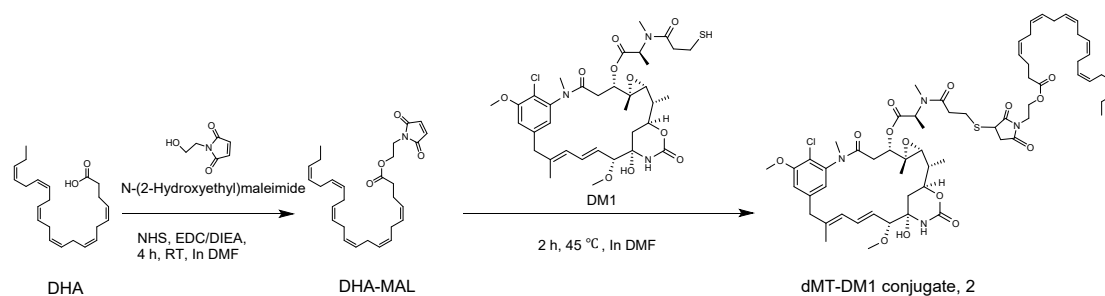

### Supplementary Scheme 2. Synthetic scheme of conjugate 2

DHA (50.0 mg, 0.159 mmol) and N-(2-Hydroxyethyl) maleimide (MAL, 48.3 mg, 0.191 mmol) were dissolved in 1 mL of anhydrous N, N-Dimethylformamide (DMF). Next, N-Hydroxy succinimide (NHS, 22.0 mg, 0.191 mmol), EDC (36.6 mg, 0.191 mmol) and N, N-Diisopropylethylamine (DIEA, 24.6 mg, 0.191 mmol) were added to the solution. The reaction mixture was stirred at 45 °C for 4 h and then washed with 5% citric acid, saturated NaHCO<sub>3</sub> and brine. The organic layer was dried over anhydrous NaSO<sub>4</sub>, filtered, and evaporated under vacuum. The residue was purified by flash column chromatography on silica gel (DCM:MeOH = 100:1) to obtain the DHA-MAL (57 mg, yield: 84.5%) and further characterized by <sup>1</sup>H NMR spectroscopy.

<sup>1</sup>H NMR (400 MHz, CDCl<sub>3</sub>) δ 6.72 (s, 2H), 5.45 – 5.26 (m, 12H), 3.69 (dd, J = 6.4, 4.4 Hz, 2H), 3.46 (dd, J = 11.0, 5.6 Hz, 2H), 2.82 (dd, J = 12.7, 6.1 Hz, 10H), 2.37 (dd, J = 14.3, 7.4 Hz, 2H), 2.21 – 2.17 (m, 2H), 2.08 (p, J = 7.3 Hz, 2H), 0.97 (t, J = 7.5 Hz, 3H).

DHA-MAL (54.0 mg, 0.120 mmol) and DM1 (87 mg, 0.118 mmol) were dissolved in 2 mL of anhydrous DMF. After stirred at 45 °C for 2 h, the reaction mixture was evaporated under vacuum. The residue was purified by flash column chromatography on silica gel (DCM:MeOH = 20:1) to produce the desired conjugate 2 (95.1 mg, yield: 67.4 %). The conjugate 2 was characterized by <sup>1</sup>H NMR spectroscopy.

<sup>1</sup>H NMR (400 MHz, C<sub>2</sub>D<sub>6</sub>SO) δ 6.86 – 6.77 (m, 1H), 6.66 (d, J = 15.7 Hz, 2H), 6.43 (dd, J = 15.3, 11.2 Hz, 1H), 6.26 (s, 1H), 6.02 – 5.88 (m, 1H), 5.64 (dd, J = 15.2, 9.0 Hz, 1H), 5.45 – 5.30 (m, 13H), 4.78 (dd, J = 11.9, 2.2 Hz, 1H), 4.31 – 4.25 (m, 1H), 3.99 (s, 3H), 3.75 – 3.59 (m, 3H), 3.54 (ddd, J = 15.1, 6.9, 4.0 Hz, 3H), 3.35 (s, 3H), 3.20 (s, 3H), 3.14 – 3.05 (m, 2H), 3.01 (dt, J = 10.3, 7.7 Hz, 2H), 2.91 – 2.73 (m, 14H), 2.70 – 2.55 (m, 2H), 2.40 – 2.28 (m, 3H), 2.17 (ddd, J = 14.6, 9.4, 5.1 Hz, 3H), 2.07 (dd, J = 14.6, 7.4 Hz, 2H), 1.82 – 1.68 (m, 1H), 1.64 (s, 3H), 1.34 – 1.29 (m, 6H), 0.97 (t, J = 7.5 Hz, 3H), 0.80 (s, 3H).

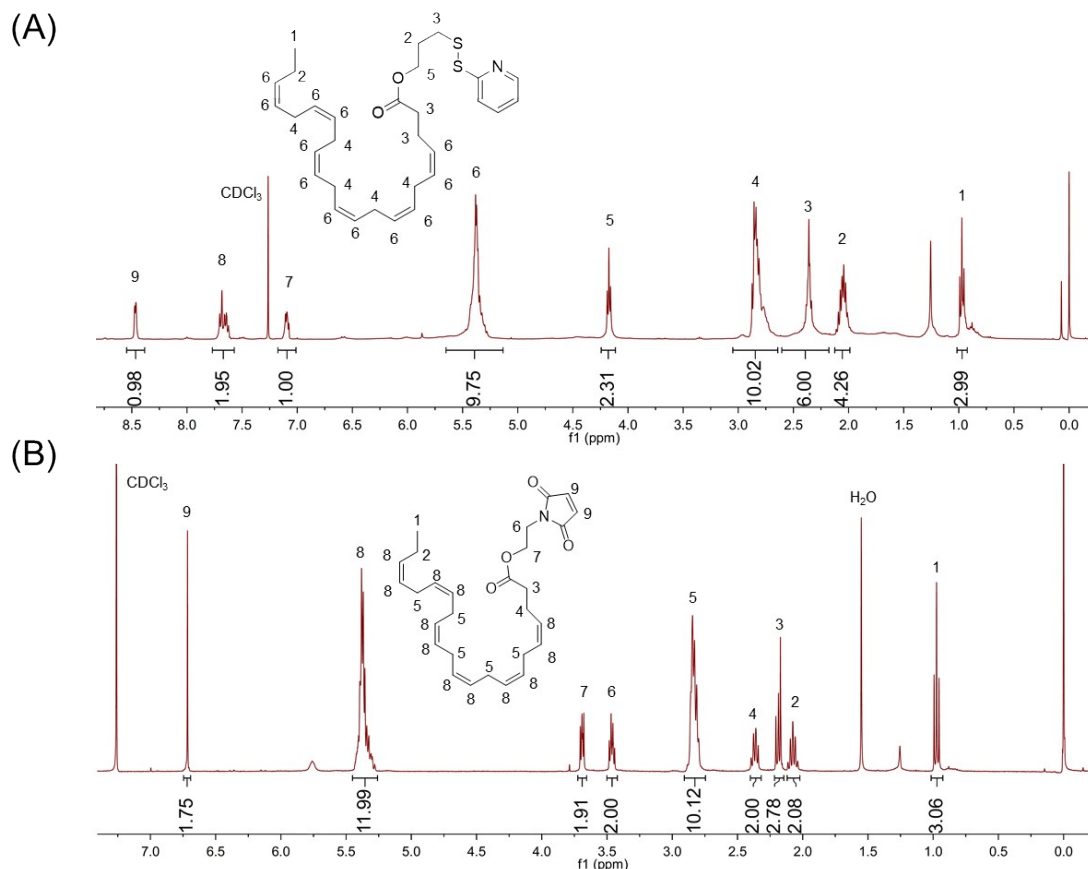

**Figure S1.**  $^1\text{H}$  NMR spectra and peak assignment of (A) DHA-SS-Pyridine and (B) DHA-MAL in  $\text{CDCl}_3$ , respectively.

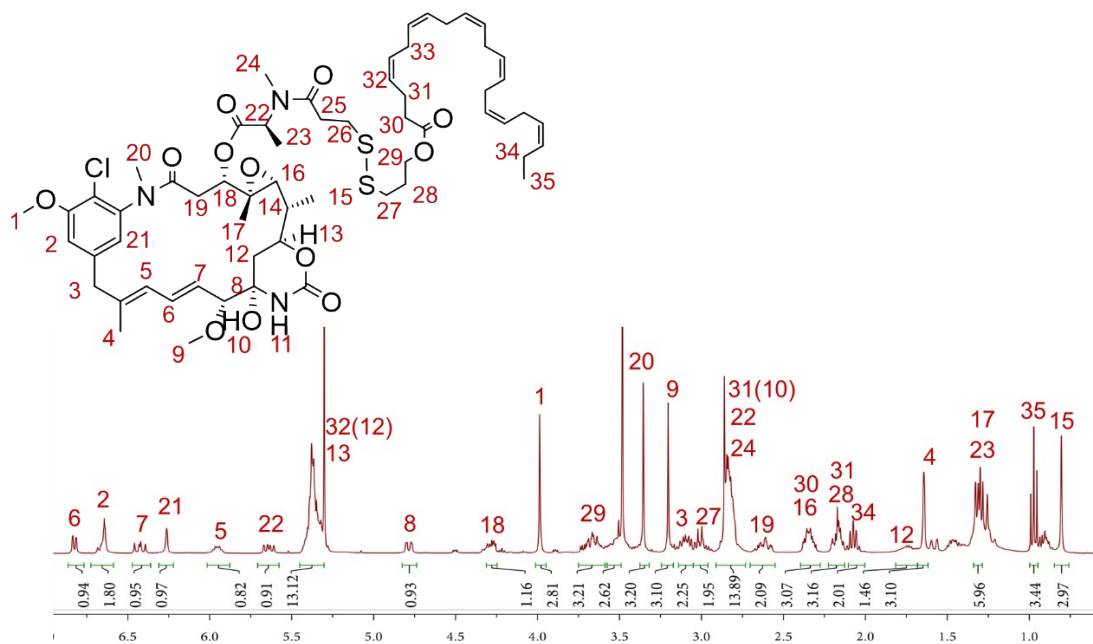

**Figure S2.** Synthetic spectrum and  $^1\text{H}$  NMR of dSS-DM1 in  $\text{C}_2\text{D}_6\text{SO}$ .

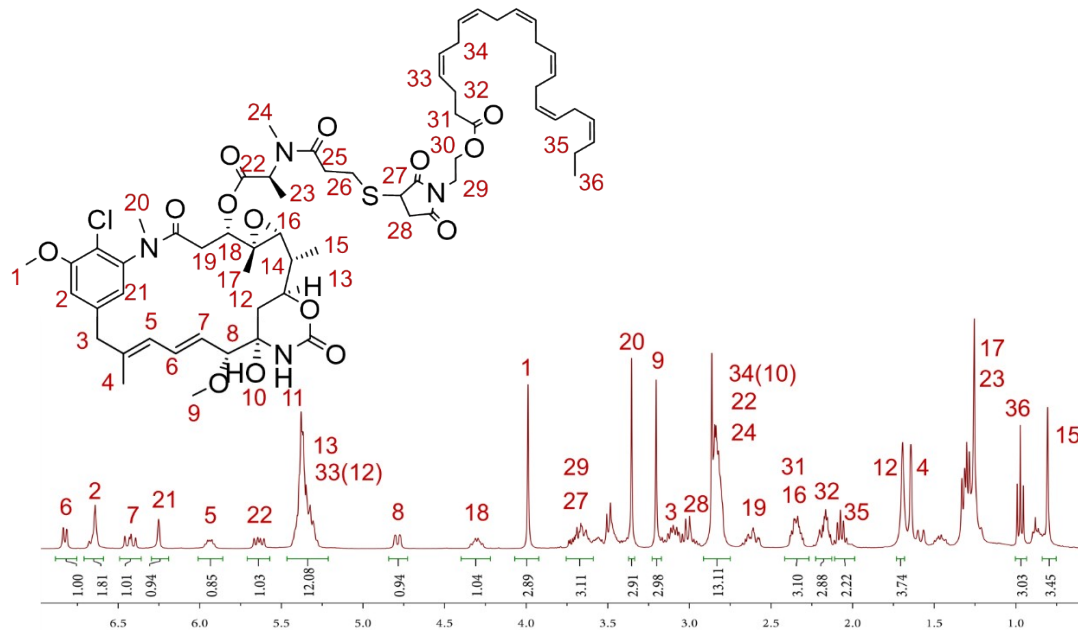

Figure S3. Synthetic spectrum and  $^1\text{H}$  NMR of dMT-DM1 in  $\text{C}_2\text{D}_6\text{SO}$ .

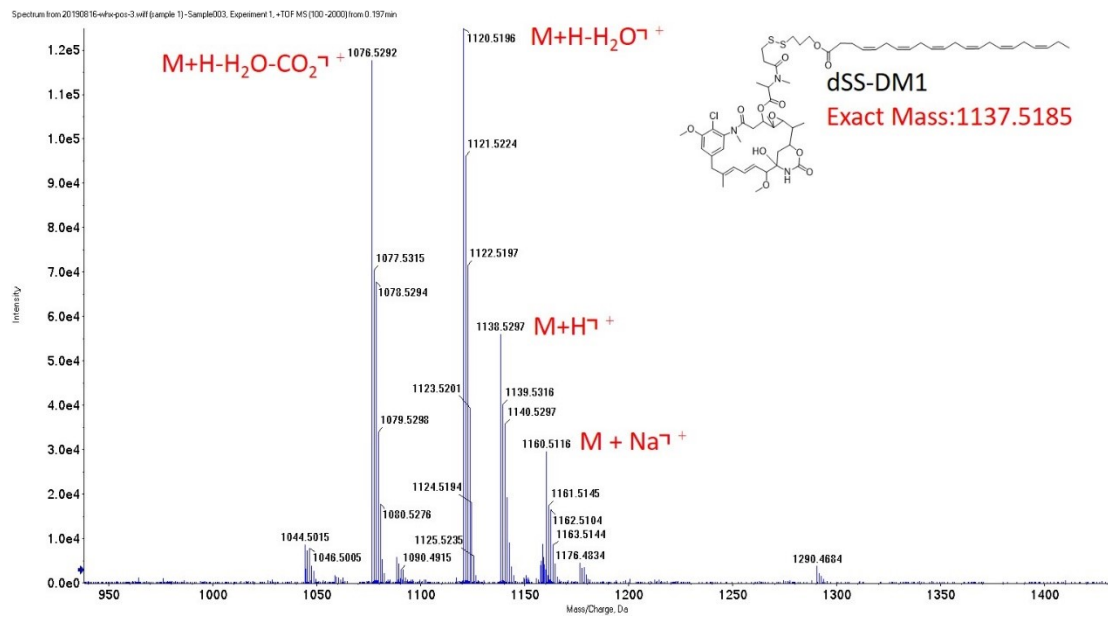

Figure S4. MALDI-TOF-MS of dSS-DM1.

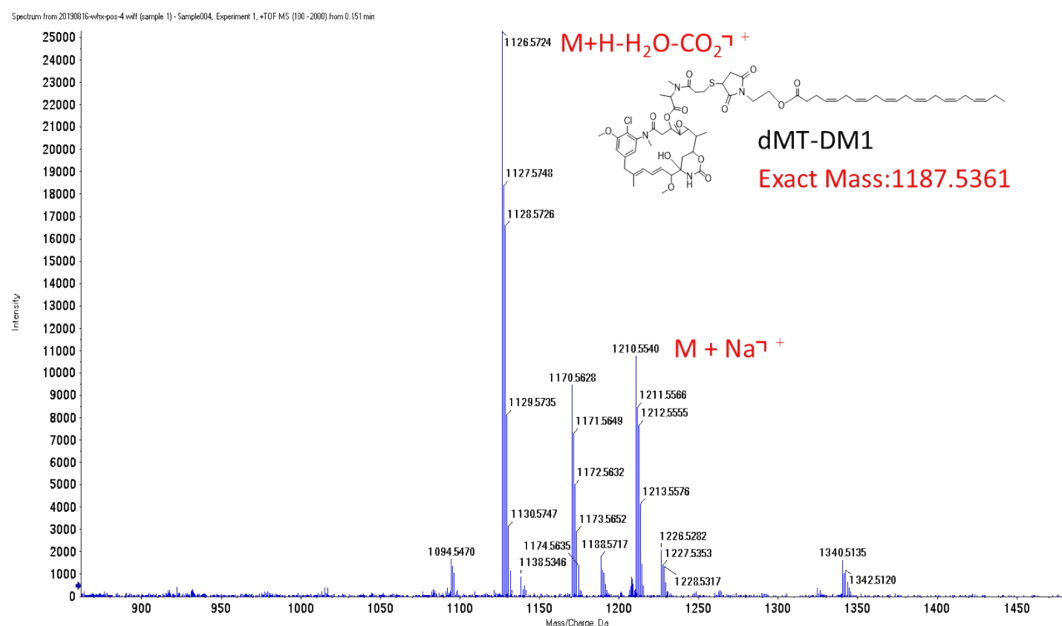

**Figure S5.** MALDI-TOF-MS of **dMT-DM1**.

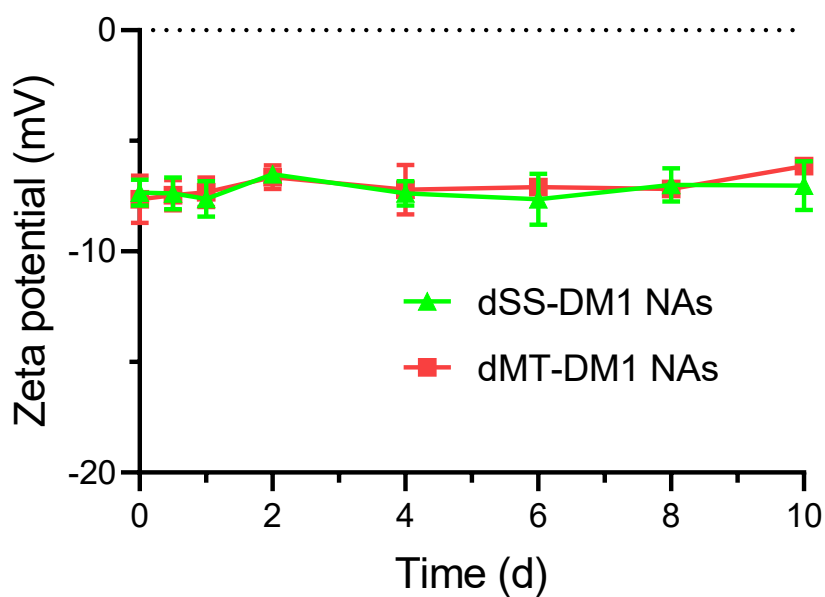

**Figure S6.** Time-dependent studies on the stability of the nanoparticles in phosphate-buffered saline (PBS, pH 7.4) containing 10% fetal bovine serum (FBS) at 4°C.

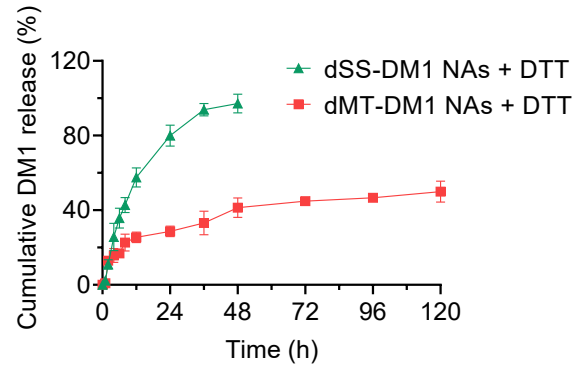

**Figure S7.** Accumulative drug release profiles from **dSS-DM1 NAs** and **dMT-DM1 NAs** incubated with or without 10 mM DTT at 37 °C.

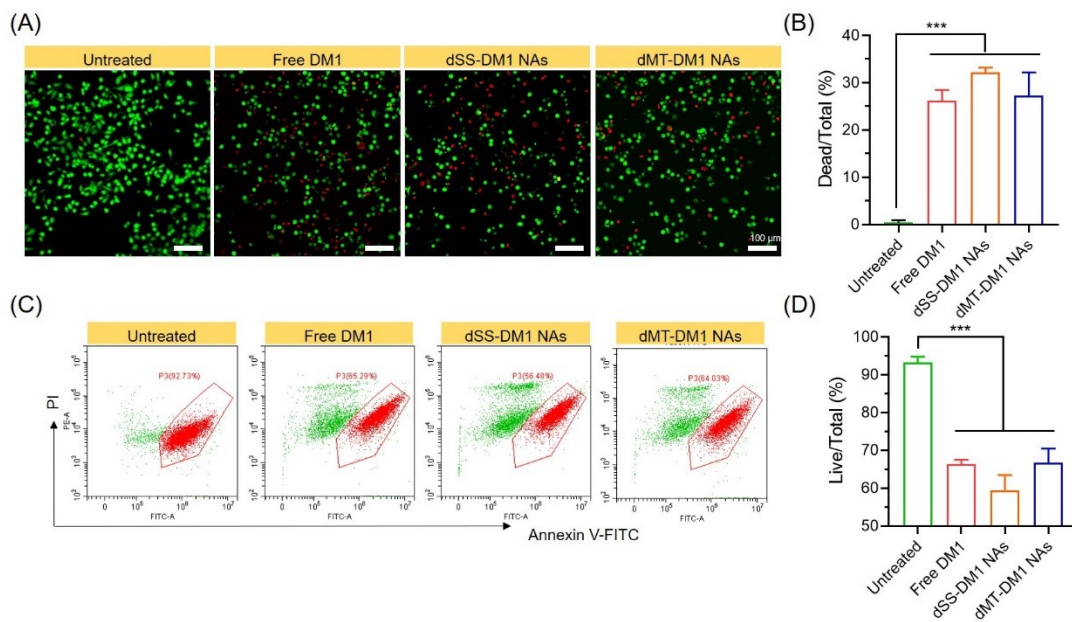

**Figure S8.** (A, B) Fluorescence microscopy images of HeLa/PTX cells costained with calcein-AM (green, live cells) and propidium iodide (PI, red, dead cells). (C, D) Flow cytometry analysis of HeLa/PTX cell mortality rate induced by different formulations at 30 nM DM1-equivalent concentrations. The data are presented as the mean  $\pm$  SD ( $n = 3$ ). \*  $p < 0.05$ , \*\*  $p < 0.01$ , \*\*\*  $p < 0.001$ , #  $p > 0.05$ .

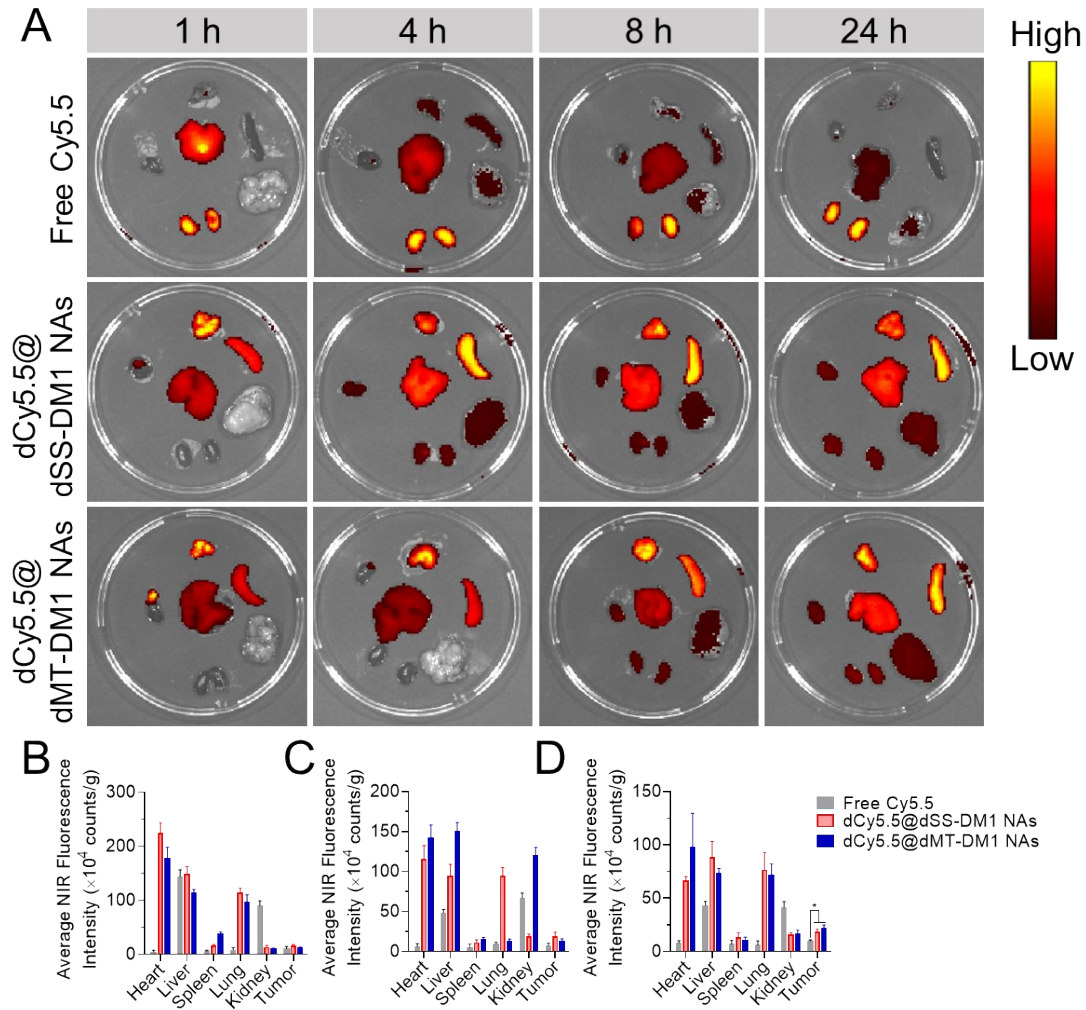

**Figure S9.** Biodistribution of dCy5.5@NAs in a HeLa/PTX xenograft-bearing mouse model ( $n = 3$ ). (A) *Ex vivo* fluorescence images of tumors and major organs. Free Cy5.5, dCy5.5@dSS-DM1 NAs and dCy5.5@dMT-DM1 NAs (20  $\mu\text{g}$  of Cy5.5 per mouse) were intravenously injected into bearing nude mice. Quantitative analysis of average NIR fluorescence intensity at 1 h (B), at 4 h (C) and at 8 h (D) after post-injection. The data are presented as mean  $\pm$  SD ( $n = 3$ ). # $p > 0.05$ , \* $p < 0.05$ , \*\* $p < 0.01$ , \*\*\* $p < 0.001$ .

**Table S1.** Drug loading (DL) of dSS-DM1 NAs and dMT-DM1 NAs ( $n = 3$ )

| Drug formulation | dSS-DM1 NAs      | dMT-DM1 NAs      |
|------------------|------------------|------------------|
| DM1              | 64.1% $\pm$ 0.3% | 62.5% $\pm$ 2.0% |
